# Supplementary material for: Fecal pollution source characterization in the surface waters of recharge and contributing zones of a karst aquifer using general and host-associated fecal genetic markers
Source: Royal Society of Chemistry journal article supplement (doi:10.1039/d2em00418f), 2022-01-01
Supplement: d2em00418f1.pdf [file d2em00418f1.pdf]

## Supplementary information

### **Fecal pollution source characterization in the surface waters of recharge and contributing zones of a karst aquifer using general and host-associated fecal genetic markers**

*Kiran Kumar Vadde<sup>1</sup>, Duc C. Phan<sup>1#</sup>, Sina V. Moghadam<sup>1</sup>, Arash Jafarzadeh<sup>1</sup>, Akanksha Matta<sup>1,2</sup>, Drew Johnson<sup>1</sup>, and Vikram Kapoor<sup>1\*</sup>*

<sup>1</sup>School of Civil & Environmental Engineering, and Construction Management, University of Texas at San Antonio, San Antonio, TX 78249, USA

<sup>2</sup>Department of Chemistry, University of Texas at San Antonio, San Antonio, TX 78249, USA

<sup>#</sup>present address: US Salinity Laboratory, USDA-ARS, Riverside, CA 92507, USA

\*Corresponding author: [vikram.kapoor@utsa.edu](mailto:vikram.kapoor@utsa.edu).

**Table S1.** Description and land-use information of sampling sites selected for the current study.

| Sampling Site                  | Latitude | Longitude | Zone                                              | Site description                                                                                                                                                                           |
|--------------------------------|----------|-----------|---------------------------------------------------|--------------------------------------------------------------------------------------------------------------------------------------------------------------------------------------------|
| Leon Creek-1<br>(L-1)          | 29.5422  | -98.6320  | Recharge                                          | Located in a residential area and the furthest downstream side of the Edward's Aquifer recharge zone. The waste discharge point is located at around 100m from this site.                  |
| Leon Creek-2<br>(L-2)          | 29.6489  | -98.6216  | Contributing                                      | Located near Dominion neighborhood and the Dominion Country Club and golf course; A waste discharge point is located about 10m to the North.                                               |
| Leon Creek-3<br>(L-3)          | 29.6494  | -98.6219  | Contributing                                      | Located about 100m upstream of the L-2 and near Dominion neighborhood and the Dominion Country Club and golf course; A waste discharge point is located about 10m to the South.            |
| Leon Creek-4<br>(L-4)          | 29.5793  | -98.6074  | Contributing<br>Zone within<br>Transition<br>Zone | Located near the University of Texas at San Antonio (UTSA) and next to a student housing apartment complex; An outfall is located about 100m NE of the sampling site.                      |
| Balcones<br>Creek-1 (B-1)      | 29.7331  | -98.7035  | Contributing                                      | Located in a rural area in the northern boundary of Bexar County.                                                                                                                          |
| Balcones<br>Creek-2 (B-2)      | 29.7385  | -98.6880  | Contributing                                      | Located in a rural area in the northern boundary of Bexar County; about 1.5km from the B-1 site.                                                                                           |
| Balcones<br>Creek-3 (B-3)      | 29.7411  | -98.6446  | Recharge                                          | Located near the City of Fair Oaks Ranch in the northern boundary of Bexar County.                                                                                                         |
| Balcones<br>Creek- 4 (B-4)     | 29.7420  | -98.6456  | Recharge                                          | Located near the City of Fair Oaks Ranch in the northern boundary of Bexar County; Around 1km from site B-3. Cibolo creek converges with Balcones Creek about 1.5km upstream of this site. |
| San Geronimo<br>Creek- 1 (S-1) | 29.6207  | -98.7946  | Contributing                                      | Located on the farthest west side to Bexar County and samples were collected from the east side stream of the creek (to the east of Bandera Road).                                         |
| San Geronimo<br>Creek- 2 (S-2) | 29.6208  | -98.7956  | Contributing                                      | Located on the farthest west side to Bexar County and samples were collected from the west side upstream of the creek that convergence with the S-1 site.                                  |
| Helotes<br>Creek-1 (H-1)       | 29.6061  | -98.6859  | Contributing                                      | Located in a rural village. This site is closer (<2mi.) to Edwards aquifer recharge zone.                                                                                                  |

**Table S2.** List of primers and probes used in this study.

| Assay                                                           | Primer/probe sequences (5'-3') <sup>a</sup>                                                       | Reference                             |
|-----------------------------------------------------------------|---------------------------------------------------------------------------------------------------|---------------------------------------|
| <i>E. coli</i><br>(EC23S857)                                    | F: GGTAGAGCACTGTTTTGGCA<br>R: TGTCTCCCGTGATAACTTTCTC<br>P: FAM-TCATCCCGACTTACCAACCCG-TAMRA        | Chern et al., 2011 <sup>1</sup>       |
| General <i>Enterococcus</i><br>(Enterol)                        | F: AGAAATTCCAAACGAACTTG<br>R: CAGTGCTCTACCTCCATCATT<br>P: FAM-TGGTTCTCTCCGAAATAGCTTTAGGGCTA-TAMRA | Ludwig & Schleifer, 2000 <sup>2</sup> |
| Universal <i>Bacteroidales</i><br>(BacUni)                      | F: CGTTATCCGGATTTATTGGGTTTA<br>R: CAATCGGAGTTCTTCGTGATATCTA<br>P: FAM-TGGTGTAGCGGTGAAA-TAMRA-MGB  | Kildare et al., 2007 <sup>3</sup>     |
| Human-associated <i>Bacteroidales</i><br>(BacHum)               | F: TGAGTTCACATGTCCGCATGA<br>R: CGTTACCCCGCCTACTATCTAATG<br>P: FAM-TCCGGTAGACGATGGGGATGCGTT-TAMRA  | Kildare et al., 2007 <sup>3</sup>     |
| Human-associated <i>Bacteroidales</i><br>(HF183)                | F: ATCATGAGTTCACATGTCCG<br>R: CGTAGGAGTTTGGACCGTGT<br>P: FAM-CTGAGAGGAAGGTCCCCCACATTGGA-TAMRA     | Haugland et al., 2010 <sup>4</sup>    |
| Cow-associated <i>Bacteroidales</i><br>(BacCow)                 | F: CCAACCTTCCCGATACTC<br>R: GGACCGTGTCTCAGTTCCAGTG<br>P: FAM-TAGGGGTTCTGAGAGGAAGGTCCCC-TAMRA      | Kildare et al., 2007 <sup>3</sup>     |
| Ruminant-associated <i>Bacteroidales</i><br>(Rum2Bac)           | F: ACAGCCCGCGATTGATACTGGTAA<br>R: CAATCGGAGTTCTTCGTGAT<br>P: FAM-ATGAGGTGGATGGAATTCGTGGTGT-TAMRA  | Mieszkin et al., 2010 <sup>5</sup>    |
| Dog-associated <i>Bacteroidales</i><br>(BacCan)                 | F: GGAGCGCAGACGGGTTTT<br>R: CAATCGGAGTTCTTCGTGATATCTA<br>P: FAM-TGGTGTAGCGGTGAAA-MGB              | Kildare et al., 2007 <sup>3</sup>     |
| Chicken-Duck associated <i>Bacteroidales</i><br>(Bird-specific) | F: AATATTGGTCAATGGGCGAGAG<br>R: CACGTAGTGTCCGTTATTCCTTA<br>P: FAM-TCCTTCACGCTACTTGG-MGB           | Kobayashi et al., 2013 <sup>6</sup>   |
| Avian associated marker (GFD)                                   | F: TCGGCTGAGCACTCTAGGG<br>R: GCGTCTCTTTGTACATCCCA                                                 | Green et al., 2012 <sup>7</sup>       |

<sup>a</sup> F, forward primer; R, reverse primer; P, probe.



---

|           |     |     |     |     |     |     |     |     |     |     |     |     |
|-----------|-----|-----|-----|-----|-----|-----|-----|-----|-----|-----|-----|-----|
| 2/21/2020 | 0.1 | 0.1 | 0.1 | 0.1 | 0.1 | 0.1 | 0.1 | 0.1 | 0.1 | 0.1 | 0.1 | 0.0 |
| 3/6/2020  | 0.3 | 0.3 | 0.3 | 0.3 | 0.3 | 0.3 | 0.3 | 0.3 | 0.3 | 0.6 | 0.6 | 0.1 |

---

**Table S4.** Land-use variables within 1 km radius of study sites.

| <b>Site</b> | <b>Septic tank density (tanks/km<sup>2</sup>)</b> | <b>Human population</b> | <b>Impervious surface (%)</b> |
|-------------|---------------------------------------------------|-------------------------|-------------------------------|
| L-1         | 15                                                | 16776                   | 32                            |
| L-2         | 30                                                | 1488                    | 15                            |
| L-3         | 30                                                | 1488                    | 15                            |
| L-4         | 1                                                 | 4401                    | 31                            |
| B-1         | 10                                                | 850                     | 6                             |
| B-2         | 9                                                 | 722                     | 6                             |
| B-3         | 39                                                | 452                     | 7                             |
| B-4         | 36                                                | 801                     | 7                             |
| S-1         | 1                                                 | 2238                    | 11                            |
| S-2         | 1                                                 | 2200                    | 11                            |
| H-1         | 51                                                | 8670                    | 15                            |

**Table S5.1** Nitrate (NO<sub>3</sub>-N) concentrations (mg/L) in the water samples collected from different sites of the study area.

| <b>Sampling date</b> | <b>L-1</b> | <b>L-2</b> | <b>L-3</b> | <b>L-4</b> | <b>B-1</b> | <b>B-2</b> | <b>B-3</b> | <b>B-4</b> | <b>S-1</b> | <b>S-2</b> | <b>H-1</b> |
|----------------------|------------|------------|------------|------------|------------|------------|------------|------------|------------|------------|------------|
| 03/01/2019           | BDL        | 1.12       | 1.26       | 0.60       | BDL        | 0.43       | BDL        | BDL        | BDL        | 0.27       | 0.53       |
| 03/18/2019           | BDL        | BDL        | BDL        | 0.77       | BDL        | BDL        | 0.30       | BDL        | BDL        | BDL        | BDL        |
| 03/29/2019           | BDL        | 0.44       | 0.32       | 0.45       | BDL        | 0.46       | BDL        | BDL        | BDL        | 0.24       | 0.27       |
| 04/12/2019           | 0.25       | BDL        | BDL        | 0.55       | BDL        | BDL        | BDL        | BDL        | BDL        | BDL        | 0.34       |
| 04/26/2019           | 0.27       | 0.36       | 0.48       | BDL        | BDL        | BDL        | 0.88       | 0.56       | BDL        | 0.42       | 0.22       |
| 05/10/2019           | 0.52       | 0.69       | 0.66       | 0.58       | 0.29       | 0.46       | 0.57       | 0.45       | BDL        | BDL        | 0.73       |
| 05/24/2019           | BDL        | 1.30       | 1.51       | 0.23       | 0.23       | 0.31       | BDL        | BDL        | BDL        | BDL        | 0.71       |
| 06/07/2019           | BDL        | BDL        | 0.41       | 0.57       | BDL        | 0.25       | BDL        | BDL        | BDL        | BDL        | 0.29       |
| 06/21/2019           | 0.27       | BDL        | 0.28       | BDL        | BDL        | BDL        | BDL        | BDL        | BDL        | 0.29       | 0.26       |
| 07/08/2019           | 0.72       | BDL        | 0.53       | 0.24       | 0.23       | BDL        | BDL        | BDL        | BDL        | BDL        | BDL        |
| 07/19/2019           | BDL        | 0.20       | BDL        | 0.22       | 0.52       |
| 08/02/2019           | 0.23       | BDL        | 0.26       |
| 08/16/2019           | BDL        | 0.23       | BDL        | BDL        | BDL        |
| 08/30/2019           | BDL        | BDL        | BDL        | 0.13       | BDL        |
| 09/13/2019           | 0.29       | 0.38       | 0.56       | 0.64       | BDL        | 0.48       | BDL        | 0.24       | BDL        | BDL        | 0.63       |
| 09/27/2019           | 0.32       | BDL        |
| 10/11/2019           | BDL        |
| 10/25/2019           | 1.48       | 0.73       | 0.67       | 1.18       | BDL        | 1.09       | BDL        | 1.42       | BDL        | BDL        | BDL        |
| 11/08/2019           | 0.47       | 0.30       | 0.60       | 0.42       | 0.07       | 0.10       | 0.07       | 0.08       | 0.08       | 0.09       | 0.14       |
| 11/22/2019           | 0.07       | 0.19       | 0.29       | 0.28       | 0.07       | 0.09       | 0.07       | BDL        | 0.07       | 0.07       | 0.14       |
| 12/06/2019           | BDL        | BDL        | 0.11       | 0.48       | BDL        |
| 12/20/2019           | BDL        | BDL        | 0.07       | 0.41       | 0.13       | 0.07       | BDL        | BDL        | BDL        | BDL        | BDL        |
| 01/10/2020           | BDL        | BDL        | BDL        | 0.45       | BDL        |            | BDL        | BDL        | 0.07       | BDL        | 0.16       |
| 01/24/2020           | 0.06       | 0.07       | 0.17       | 0.15       | 0.06       | 0.14       | 0.07       | 0.07       | 0.07       | 0.09       | 0.13       |
| 02/07/2020           | 0.07       | BDL        | 0.17       | 0.11       | 0.06       | 0.07       | 0.16       | BDL        | 0.07       | 0.12       | 0.08       |
| 02/21/2020           | BDL        | 0.05       | 0.09       | 0.12       | BDL        | BDL        | 0.07       | BDL        | BDL        | BDL        | BDL        |
| 03/06/2020           | BDL        | BDL        | 0.29       | BDL        |

BDL, Below detection limits.

**Table S5.2** Nitrite (NO<sub>2</sub>-N) concentrations (mg/L) in the water samples collected from different sites of the study area.

| Sampling date | L-1  | L-2  | L-3  | L-4  | B-1  | B-2  | B-3  | B-4  | S-1 | S-2  | H-1  |
|---------------|------|------|------|------|------|------|------|------|-----|------|------|
| 03/01/2019    | BDL  | BDL | BDL  | BDL  |
| 03/18/2019    | BDL  | BDL | BDL  | BDL  |
| 03/29/2019    | BDL  | BDL | BDL  | BDL  |
| 04/12/2019    | BDL  | BDL  | BDL  | 0.02 | BDL  | BDL  | BDL  | BDL  | BDL | BDL  | BDL  |
| 04/26/2019    | BDL  | 0.02 | 0.03 | 0.03 | BDL  | BDL  | 0.02 | 0.02 | BDL | 0.02 | 0.01 |
| 05/10/2019    | BDL  | BDL  | 0.02 | 0.02 | BDL  | BDL  | 0.02 | BDL  | BDL | BDL  | BDL  |
| 05/24/2019    | BDL  | 0.03 | 0.04 | BDL  | BDL  | BDL  | BDL  | BDL  | BDL | BDL  | BDL  |
| 06/07/2019    | BDL  | 0.03 | 0.02 | 0.03 | BDL  | BDL  | BDL  | BDL  | BDL | BDL  | BDL  |
| 06/21/2019    | 0.03 | BDL  | BDL | BDL  | BDL  |
| 07/08/2019    | BDL  | BDL  | 0.02 | BDL  | 0.02 | BDL  | BDL  | BDL  | BDL | BDL  | BDL  |
| 07/19/2019    | BDL  | 0.02 | BDL  | BDL  | BDL  | BDL  | BDL  | BDL  | BDL | BDL  | BDL  |
| 08/02/2019    | BDL  | BDL  | BDL  | BDL  | BDL  | BDL  | 0.03 | BDL  | BDL | BDL  | BDL  |
| 08/16/2019    | BDL  | BDL | BDL  | BDL  |
| 08/30/2019    | BDL  | BDL | BDL  | BDL  |
| 09/13/2019    | BDL  | 0.04 | 0.04 | 0.04 | BDL  | 0.02 | BDL  | BDL  | BDL | BDL  | BDL  |
| 09/27/2019    | BDL  | BDL | BDL  | BDL  |
| 10/11/2019    | 0.42 | BDL  | BDL  | 0.58 | BDL  | BDL  | BDL  | BDL  | BDL | BDL  | BDL  |
| 10/25/2019    | BDL  | BDL  | BDL  | BDL  | BDL  | 0.05 | BDL  | BDL  | BDL | BDL  | BDL  |
| 11/08/2019    | 0.12 | 0.12 | 0.12 | BDL  | BDL  | BDL  | BDL  | BDL  | BDL | BDL  | BDL  |
| 11/22/2019    | BDL  | 0.12 | 0.12 | BDL  | BDL  | BDL  | BDL  | BDL  | BDL | BDL  | BDL  |
| 12/06/2019    | BDL  | BDL | BDL  | BDL  |
| 12/20/2019    | BDL  | BDL  | BDL  | BDL  | BDL  | 0.04 | BDL  | 0.09 | BDL | BDL  | BDL  |
| 01/10/2020    | BDL  | BDL  | BDL  | 0.08 | BDL  |      | BDL  | BDL  | BDL | BDL  | BDL  |
| 01/24/2020    | 0.12 | BDL  | BDL | BDL  | BDL  |
| 02/07/2020    | BDL  | BDL | BDL  | BDL  |
| 02/21/2020    | BDL  | BDL | BDL  | BDL  |
| 03/06/2020    | BDL  | BDL  | 0.02 | BDL  | BDL  | BDL  | BDL  | BDL  | BDL | BDL  | BDL  |

BDL, Below detection limits.



**Table S5.3** Ammonia nitrogen (NH<sub>4</sub>-N) concentrations (mg/L) in the water samples collected from different sites of the study area.

| Sampling date | L-1  | L-2  | L-3  | L-4  | B-1  | B-2  | B-3  | B-4  | S-1  | S-2  | H-1  |
|---------------|------|------|------|------|------|------|------|------|------|------|------|
| 03/01/2019    | BDL  | BDL  | BDL  | 0.02 | BDL  | BDL  | 0.02 | BDL  | BDL  | BDL  | BDL  |
| 03/18/2019    | BDL  | 0.02 |
| 03/29/2019    | 0.02 | BDL  | 0.05 | 0.03 | BDL  |
| 04/12/2019    | BDL  |
| 04/26/2019    | BDL  | 0.03 | 0.03 | BDL  | BDL  | BDL  | 0.03 | 0.02 | 0.02 | 0.11 | 0.16 |
| 05/10/2019    | BDL  | 0.02 | BDL  | 0.02 | BDL  | 0.02 | 0.04 | 0.02 | BDL  | BDL  | 0.02 |
| 05/24/2019    | BDL  | 0.03 | 0.02 | 0.03 | 0.02 | BDL  | BDL  | BDL  | BDL  | BDL  | 0.03 |
| 06/07/2019    | 0.04 | BDL  | 0.05 | 0.02 | 0.02 | 0.02 | BDL  | BDL  | BDL  | 0.02 | 0.02 |
| 06/21/2019    | 0.03 | 0.02 | BDL  | 0.02 | 0.02 | BDL  | BDL  | 0.02 | 0.02 | 0.03 | 0.03 |
| 07/08/2019    | BDL  | BDL  | BDL  | 0.02 | 0.02 | BDL  | BDL  | BDL  | BDL  | 0.20 | BDL  |
| 07/19/2019    | 0.05 | BDL  | 0.02 | 0.02 | BDL  | BDL  | BDL  | BDL  | BDL  | 0.02 | 0.02 |
| 08/02/2019    | 0.04 | 0.02 | BDL  | 0.03 | BDL  | 0.02 | 0.03 | 0.02 | BDL  | 0.02 | BDL  |
| 08/16/2019    | 0.02 | 0.16 | BDL  | 0.03 | BDL  | BDL  | BDL  | BDL  | BDL  | 0.02 | 0.02 |
| 08/30/2019    | 0.03 | 0.03 | 0.02 | 0.10 | BDL  | BDL  | BDL  | BDL  | BDL  | 0.02 | 0.03 |
| 09/13/2019    | 0.04 | 0.02 | 0.03 | 0.15 | 0.04 | 0.06 | 0.03 | 0.09 | BDL  | BDL  | 0.03 |
| 09/27/2019    | 0.02 | BDL  | BDL  | 0.07 | 0.02 | 0.15 | BDL  | 0.03 | BDL  | 0.02 | 0.04 |
| 10/11/2019    | 0.04 | 0.22 | BDL  | 0.09 | BDL  | 0.09 | 0.02 | 0.79 | BDL  | BDL  | 0.04 |
| 10/25/2019    | 0.03 | BDL  | BDL  | BDL  | BDL  | 0.18 | BDL  | BDL  | BDL  | BDL  | BDL  |
| 11/08/2019    | BDL  | BDL  | BDL  | BDL  | BDL  | 0.16 | BDL  | BDL  | BDL  | BDL  | BDL  |
| 11/22/2019    | BDL  |
| 12/06/2019    | BDL  | 0.03 | BDL  |
| 12/20/2019    | BDL  | 0.02 | BDL  | 0.09 | BDL  | 0.05 | 0.03 | BDL  | BDL  | BDL  | 0.04 |
| 01/10/2020    | BDL  | 0.04 | 0.04 | 0.02 | 0.02 |      | 0.02 | 0.03 | 0.03 | 0.03 | 0.03 |
| 01/24/2020    | BDL  | BDL  | BDL  | 0.03 | BDL  |
| 02/07/2020    | BDL  | BDL  | BDL  | BDL  | BDL  | BDL  | 0.07 | 0.06 | BDL  | BDL  | BDL  |
| 02/21/2020    | BDL  | BDL  | BDL  | BDL  | BDL  | BDL  | 0.11 | BDL  | BDL  | BDL  | BDL  |
| 03/06/2020    | BDL  |

BDL, Below detection limits.

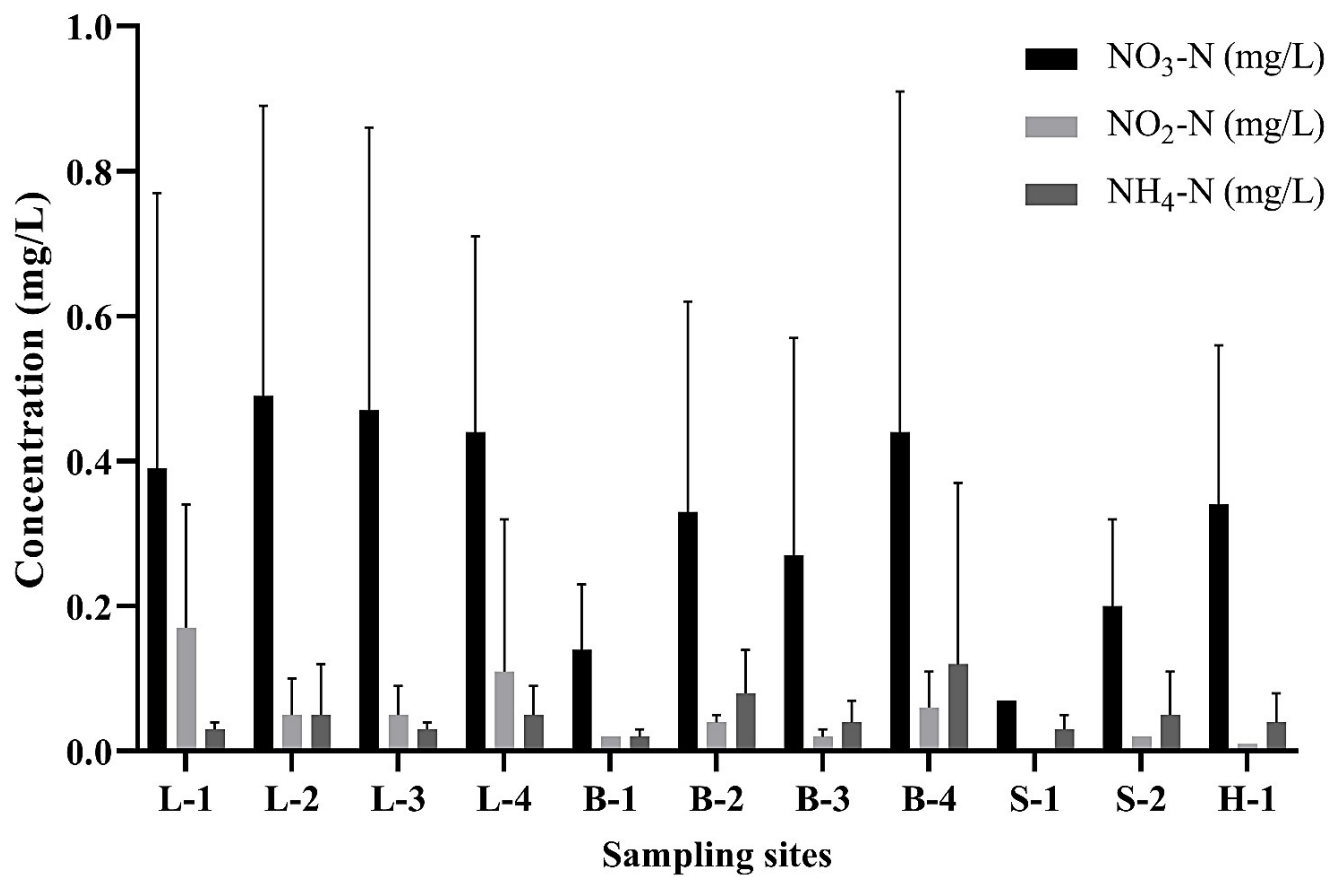

**Figure S1.** Median concentration (mg/L) of nitrate (NO<sub>3</sub>-N), nitrite (NO<sub>2</sub>-N), and ammonia (NH<sub>4</sub>-N) detected in the water samples collected from different sites of Leon (L), Balcones (B), San Geronimo (S), and Helotes (H) creeks.

**Table S6.** Performance characteristics (range) of qPCR assays were carried out in this study.

| <b>Assay</b>     | <b>Efficiency (%)</b> | <b><math>R^2</math></b> | <b>Slope</b>   | <b>LOQ (GC/reaction)</b> | <b>LOD<sup>a</sup> (GC/reaction)</b> |
|------------------|-----------------------|-------------------------|----------------|--------------------------|--------------------------------------|
| <i>E. coli</i>   | 98.4 to 107           | 0.985 to 0.998          | -3.16 to -3.36 | 10                       | 3                                    |
| <i>Enterol</i>   | 93.2 to 99.7          | 0.996 to 0.999          | -3.33 to -3.49 | 20                       | 3                                    |
| BacUni           | 95.8 to 109           | 0.980 to 0.990          | -3.10 to -3.31 | 10                       | 3                                    |
| BacHum           | 97.0 to 102           | 0.996 to 0.998          | -3.25 to -3.39 | 10                       | 3                                    |
| HF183            | 92.3 to 99.8          | 0.984 to 0.999          | -3.35 to -3.52 | 10                       | 3                                    |
| Rum2Bac          | 97.1 to 105           | 0.980 to 0.989          | -3.19 to -3.39 | 10                       | 3                                    |
| BacCow           | 91.6 to 104           | 0.976 to 0.998          | -3.22 to -3.54 | 10                       | 3                                    |
| BacCan           | 89.4 to 101           | 0.993 to 0.996          | -3.30 to -3.60 | 10                       | 3                                    |
| Chicken/Duck-Bac | 97.0 to 99.5          | 0.997 to 0.999          | -3.35 to -3.39 | 10                       | 3                                    |
| GFD              | 91.2 to 102           | 0.997 to 0.998          | -3.28 to -3.55 | 10                       | 3                                    |

<sup>a</sup> based on according to <sup>8</sup> and <sup>9</sup>.

**Table S7.** Correlation (Pearson's) between nutrients, FIB and MST markers detected in all sampling sites of Edwards aquifer.

|                         | NO <sub>2</sub> -N | NO <sub>3</sub> -N | NH <sub>4</sub> -N | <i>E.coli</i> | <i>Enterol</i> | BacUni       | BacHum        | HF183 | Rum2Bac | BacCow       | BacCan       | CDBac | GFD |
|-------------------------|--------------------|--------------------|--------------------|---------------|----------------|--------------|---------------|-------|---------|--------------|--------------|-------|-----|
| <b>NO<sub>2</sub>-N</b> | 1                  |                    |                    |               |                |              |               |       |         |              |              |       |     |
| <b>NO<sub>3</sub>-N</b> | 0.554              | 1                  |                    |               |                |              |               |       |         |              |              |       |     |
| <b>NH<sub>4</sub>-N</b> | 0.042              | 0.377              | 1                  |               |                |              |               |       |         |              |              |       |     |
| <b><i>E.coli</i></b>    | 0.362              | 0.354              | 0.012              | 1             |                |              |               |       |         |              |              |       |     |
| <b><i>Enterol</i></b>   | 0.462              | 0.199              | -0.245             | <b>.678*</b>  | 1              |              |               |       |         |              |              |       |     |
| <b>BacUni</b>           | 0.307              | 0.464              | 0.204              | <b>.884**</b> | 0.542          | 1            |               |       |         |              |              |       |     |
| <b>BacHum</b>           | 0.544              | 0.352              | 0.602              | 0.205         | 0.177          | 0.308        | 1             |       |         |              |              |       |     |
| <b>HF183</b>            | 0.397              | 0.561              | 0.270              | 0.345         | 0.277          | 0.348        | 0.583         | 1     |         |              |              |       |     |
| <b>Rum2Bac</b>          | 0.399              | -0.043             | 0.356              | -0.158        | -0.005         | -0.168       | <b>.802**</b> | 0.169 | 1       |              |              |       |     |
| <b>BacCow</b>           | 0.353              | 0.533              | <b>.614*</b>       | 0.079         | 0.296          | 0.259        | <b>.645*</b>  | 0.333 | 0.394   | 1            |              |       |     |
| <b>BacCan</b>           | 0.295              | <b>.672*</b>       | 0.296              | 0.393         | 0.371          | 0.481        | 0.150         | 0.452 | -0.351  | <b>.626*</b> | 1            |       |     |
| <b>CDBac</b>            | 0.113              | <b>.804**</b>      | 0.419              | 0.286         | 0.214          | 0.336        | 0.136         | 0.509 | -0.234  | 0.578        | <b>.755*</b> | 1     |     |
| <b>GFD</b>              | -0.374             | 0.118              | 0.000              | 0.336         | 0.205          | <b>.614*</b> | -0.118        | 0.120 | -0.452  | 0.036        | 0.216        | 0.229 | 1   |

\* Correlation is significant at p <0.05; \*\* Correlation is significant at p < 0.01 level; CD-Bac, Chicken/Duck-Bac.

**Table S8.1** Correlation <sup>a</sup> (Pearson's) between nutrients, FIB and MST markers in sampling sites clustered based on precipitation data.

| Cluster-1                           |                |                | Cluster-2                           |                |                | Cluster-3                           |                |                |
|-------------------------------------|----------------|----------------|-------------------------------------|----------------|----------------|-------------------------------------|----------------|----------------|
| Variables                           | <i>r</i> value | <i>p</i> value | variables                           | <i>r</i> value | <i>p</i> value | variables                           | <i>r</i> value | <i>p</i> value |
| NO <sub>2</sub> -N - <i>Enterol</i> | -0.929         | 0.022          | NO <sub>3</sub> -N - <i>Enterol</i> | 0.606          | 0.022          | NO <sub>3</sub> -N - <i>E. coli</i> | 0.635          | 0.026          |
| NO <sub>3</sub> -N - BacHum         | 0.376          | 0.045          | NO <sub>3</sub> -N - BacCan         | 0.585          | 0.028          | NO <sub>3</sub> -N - BacUni         | 0.565          | 0.006          |
| NO <sub>3</sub> -N - Rum2Bac        | 0.444          | 0.016          | NO <sub>3</sub> -N - GFD            | -0.743         | 0.002          | NO <sub>3</sub> -N - HF183          | 0.737          | 0.05           |
| <i>E. coli</i> - BacUni             | 0.557          | 0.000          | <i>E. coli</i> - BacUni             | 0.392          | 0.003          | NO <sub>3</sub> -N - CDBac          | 0.748          | 0.003          |
| <i>E. coli</i> - HF183              | 0.506          | 0.000          | <i>E. coli</i> - BacCow             | 0.344          | 0.011          | NH <sub>4</sub> -N - BacHum         | 0.948          | 0.001          |
| <i>E. coli</i> - BacCow             | 0.417          | 0.002          | <i>E. coli</i> - GFD                | 0.564          | 0.000          | NH <sub>4</sub> -N - Rum2Bac        | 0.830          | 0.021          |
| <i>E. coli</i> - BacCan             | 0.451          | 0.001          | <i>Enterol</i> - BacUni             | 0.482          | 0.000          | NH <sub>4</sub> -N - BacCow         | 0.752          | 0.041          |
| <i>E. coli</i> - CDBac              | 0.293          | 0.032          | <i>Enterol</i> - Rum2Bac            | 0.473          | 0.000          | <i>E. coli</i> - <i>Enterol</i>     | 0.775          | 0.047          |
| <i>E. coli</i> - GFD                | 0.436          | 0.001          | <i>Enterol</i> - BacCow             | 0.308          | 0.023          | <i>E. coli</i> - BacUni             | 0.927          | 0.003          |
| <i>Enterol</i> - Rum2Bac            | 0.421          | 0.002          |                                     |                |                |                                     |                |                |

<sup>a</sup> only significantly positive or negative results were reported here.

**Table S8.2** Correlation (Pearson's) between nutrients, FIB and MST markers in sampling sites clustered based on septic tank data.

| Cluster-1                           |         |         | Cluster-2                           |         |         | Cluster-3                           |         |         |
|-------------------------------------|---------|---------|-------------------------------------|---------|---------|-------------------------------------|---------|---------|
| variables                           | r value | p value | variables                           | r value | p value | variables                           | r value | p value |
| NO <sub>3</sub> -N - Rum2Bac        | 0.322   | 0.019   | NO <sub>2</sub> -N - <i>Enterol</i> | -0.759  | 0.000   | NO <sub>3</sub> -N - <i>Enterol</i> | 0.455   | 0.010   |
| NO <sub>3</sub> -N - BacCan         | 0.304   | 0.027   | NO <sub>3</sub> -N - <i>Enterol</i> | 0.279   | 0.040   | NO <sub>3</sub> -N - Rum2Bac        | 0.366   | 0.043   |
| NO <sub>3</sub> -N - GFD            | -0.283  | 0.040   | NO <sub>3</sub> -N - BacHum         | 0.424   | 0.005   | NO <sub>3</sub> -N - CDBac          | -0.435  | 0.014   |
| NH <sub>4</sub> -N - <i>E. coli</i> | 0.288   | 0.050   | NO <sub>3</sub> -N - Rum2Bac        | 0.321   | 0.036   | <i>E. coli</i> - <i>Enterol</i>     | 0.251   | 0.024   |
| <i>E. coli</i> - BacUni             | 0.503   | 0.000   | NH <sub>4</sub> -N - BacUni         | 0.360   | 0.045   | <i>E. coli</i> - BacUni             | 0.548   | 0.000   |
| <i>E. coli</i> - HF183              | 0.175   | 0.043   | NH <sub>4</sub> -N - GFD            | 0.597   | 0.000   | <i>E. coli</i> - HF183              | 0.288   | 0.010   |
| <i>E. coli</i> - BacCow             | 0.552   | 0.000   | <i>E. coli</i> - BacUni             | 0.567   | 0.000   | <i>E. coli</i> - Rum2Bac            | 0.347   | 0.002   |
| <i>E. coli</i> - BacCan             | 0.298   | 0.000   | <i>E. coli</i> - BacHum             | 0.251   | 0.024   | <i>E. coli</i> - BacCow             | 0.491   | 0.000   |
| <i>E. coli</i> - CDBac              | 0.196   | 0.023   | <i>E. coli</i> - HF183              | 0.405   | 0.000   | <i>E. coli</i> - BacCan             | 0.266   | 0.017   |
| <i>E. coli</i> - GFD                | 0.545   | 0.000   | <i>E. coli</i> - BacCow             | 0.555   | 0.000   | <i>E. coli</i> - GFD                | 0.554   | 0.000   |
| <i>Enterol</i> - BacUni             | 0.489   | 0.000   | <i>E. coli</i> - BacCan             | 0.609   | 0.000   | <i>Enterol</i> - BacUni             | 0.647   | 0.000   |
| <i>Enterol</i> - BacHum             | 0.221   | 0.010   | <i>E. coli</i> - CDBac              | 0.487   | 0.000   | <i>Enterol</i> - BacHum             | 0.292   | 0.009   |
| <i>Enterol</i> - Rum2Bac            | 0.240   | 0.005   | <i>E. coli</i> - GFD                | 0.423   | 0.000   | <i>Enterol</i> - Rum2Bac            | 0.236   | 0.035   |
| <i>Enterol</i> - BacCow             | 0.178   | 0.041   | <i>Enterol</i> - BacUni             | 0.278   | 0.012   | <i>Enterol</i> - GFD                | 0.236   | 0.035   |
|                                     |         |         | <i>Enterol</i> - BacHum             | 0.314   | 0.004   |                                     |         |         |
|                                     |         |         | <i>Enterol</i> - HF183              | 0.255   | 0.022   |                                     |         |         |
|                                     |         |         | <i>Enterol</i> - Rum2Bac            | 0.377   | 0.001   |                                     |         |         |
|                                     |         |         | <i>Enterol</i> - BacCan             | 0.267   | 0.016   |                                     |         |         |

<sup>a</sup> only significantly positive or negative results were reported here.

## References

1. E. Chern, S. Siefring, J. Paar, M. Doolittle and R. Haugland, Comparison of quantitative PCR assays for *Escherichia coli* targeting ribosomal RNA and single copy genes, *Letters in applied microbiology*, 2011, **52**, 298-306.
2. W. Ludwig and K.-H. Schleifer, How quantitative is quantitative PCR with respect to cell counts?, *Systematic and applied microbiology*, 2000, **23**, 556-562.
3. B. J. Kildare, C. M. Leutenegger, B. S. McSwain, D. G. Bambic, V. B. Rajal and S. Wuertz, 16S rRNA-based assays for quantitative detection of universal, human-, cow-, and dog-specific fecal Bacteroidales: a Bayesian approach, *Water Res*, 2007, **41**, 3701-3715.
4. R. A. Haugland, M. Varma, M. Sivaganesan, C. Kelty, L. Peed and O. C. Shanks, Evaluation of genetic markers from the 16S rRNA gene V2 region for use in quantitative detection of selected Bacteroidales species and human fecal waste by qPCR, *Systematic and Applied Microbiology*, 2010, **33**, 348-357.
5. S. Mieszkin, J. P. Furet, G. Corthier and M. Gourmelon, Estimation of pig fecal contamination in a river catchment by real-time PCR using two pig-specific Bacteroidales 16S rRNA genetic markers, *Appl Environ Microbiol*, 2009, **75**, 3045-3054.
6. A. Kobayashi, D. Sano, J. Hatori, S. Ishii and S. Okabe, Chicken-and duck-associated Bacteroides–Prevotella genetic markers for detecting fecal contamination in environmental water, *Applied microbiology and biotechnology*, 2013, **97**, 7427-7437.
7. H. C. Green, L. K. Dick, B. Gilpin, M. Samadpour and K. G. Field, Genetic markers for rapid PCR-based identification of gull, Canada goose, duck, and chicken fecal contamination in water, *Appl Environ Microbiol*, 2012, **78**, 503-510.
8. S. A. Bustin, V. Benes, J. A. Garson, J. Hellemans, J. Huggett, M. Kubista, R. Mueller, T. Nolan, M. W. Pfaffl, G. L. Shipley, J. Vandesompele and C. T. Wittwer, The MIQE guidelines: minimum information for publication of quantitative real-time PCR experiments, *Clin Chem*, 2009, **55**, 611-622.
9. T. Pitkänen, H. Ryu, M. Elk, A.-M. Hokajärvi, S. Siponen, A. Vepsäläinen, P. Räsänen and J. W. Santo Domingo, Detection of Fecal Bacteria and Source Tracking Identifiers in Environmental Waters Using rRNA-Based RT-qPCR and rDNA-Based qPCR Assays, *Environmental Science & Technology*, 2013, **47**, 13611-13620.
